# Supplementary material
Source: publisher figshare collection journal article supplement (https://acs.figshare.com/ndownloader/files/5669385)
Supplement: Supplementary file 1 [file 5669385]

#### Terms & Conditions

Electronic Supporting Information files are available without a subscription to ACS Web Editions. The American Chemical Society holds a copyright ownership interest in any copyrightable Supporting Information. Files available from the ACS website may be downloaded for personal use only. Users are not otherwise permitted to reproduce, republish, redistribute, or sell any Supporting Information from the ACS website, either in whole or in part, in either machine-readable form or any other form without permission from the American Chemical Society. For permission to reproduce, republish and redistribute this material, requesters must process their own requests via the RightsLink permission system. Information about how to use the RightsLink permission system can be found at <http://pubs.acs.org/page/copyright/permissions.html>

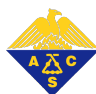

ACS Publications

MOST TRUSTED. MOST CITED. MOST READ.

Copyright © 1997 American Chemical Society

**Figure S1.** First derivative EPR spectrum of radicals generated in potassium peroxodisulfate powder by a 4 hour UV-irradiation exhibiting near uniaxial symmetry  $g_3 = 2.006 \approx g_2 < g_1 = 2.031$ , and no hyperfine splitting larger than the linewidth. Present EPR spectrum was recorded at 298 K.

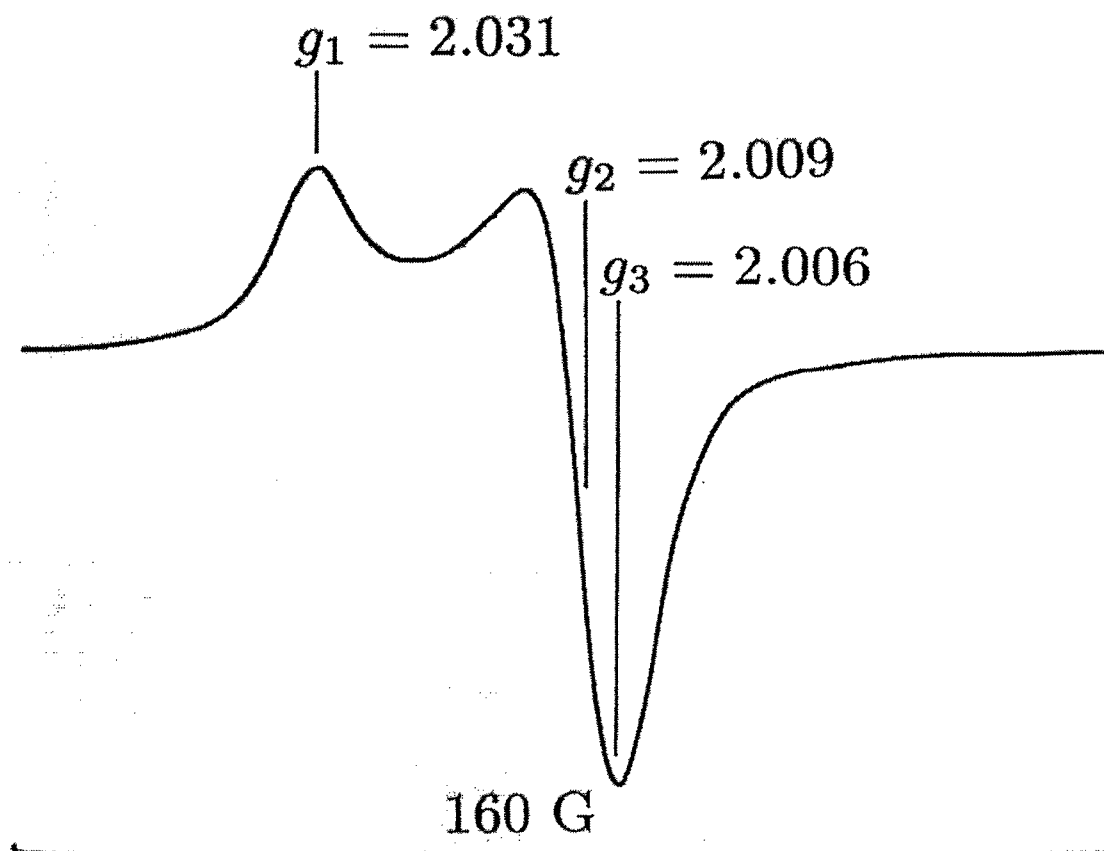

**Figure S2.** Effect of some phenols on luminol-specific ELL of UV-irradiated  $\text{K}_2\text{S}_2\text{O}_8$ : caffeic acid (■), protocatechuic acid (●), p-coumaric acid (\*), p-iodophenol (▲), p-cresol (◆), and additionally  $\text{NO}_2^-$  (○). Conditions:  $\text{pH} = 12$ ,  $1.00 \times 10^{-7}$  M luminol, 10.0 mg samples of UV-irradiated  $\text{K}_2\text{S}_2\text{O}_8$ , injection volume 1.00 mL.

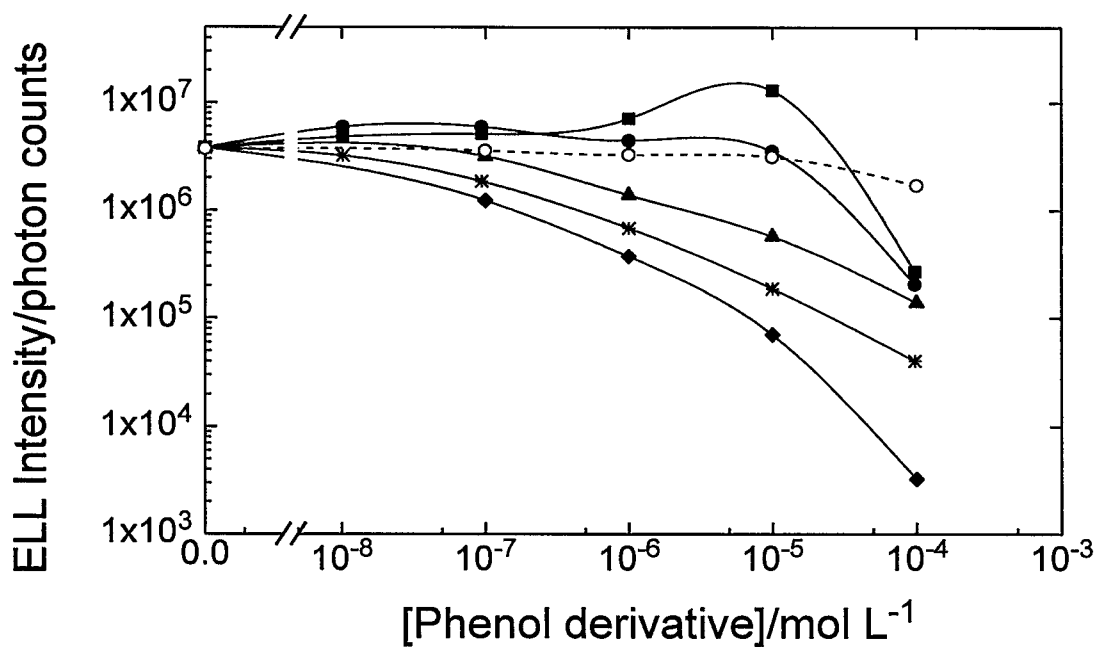

**Figure S3.** ELL and CL intensity as a function of luminol concentration. ELL (●), conditions: pH = 12, 10.0 mg samples of UV-irradiated  $K_2S_2O_8$ , injection volume 1.00 mL. CL (□), conditions: pH = 12,  $2.00 \times 10^{-3}$  M  $H_2O_2$ ,  $1.00 \times 10^{-6}$  M  $K_3Fe(CN)_6$ ; 300  $\mu$ L sample of  $H_2O_2$  solution was injected in the LL-cell containing 100  $\mu$ L luminol mixed with 300  $\mu$ L catalyst solution.

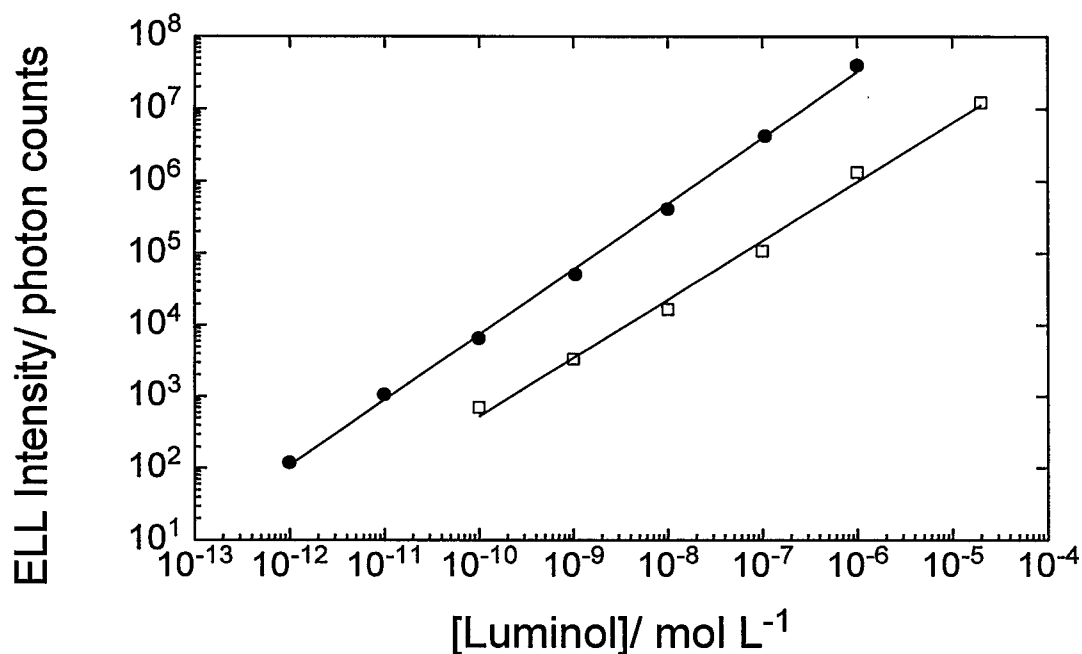

#### Effect of added phenolic compounds on the ELL

Previous studies<sup>10</sup> show that p-iodophenol enhances the chemiluminescence associated with the horseradish peroxidase-catalysed oxidation of luminol. p-Iodophenol reacts rapidly with the peroxidase reactive intermediates (rate constant value is ca  $10^7$  M<sup>-1</sup> s<sup>-1</sup>)<sup>10</sup> supporting the hypothesis that the enhancement is due to the acceleration of the enzyme turnover. In addition, it has been shown that some phenoxy radicals (Ph-O·) can oxidize luminol (S1). The reaction is reversible and the rate constants for forward and reverse reaction are often almost equal:

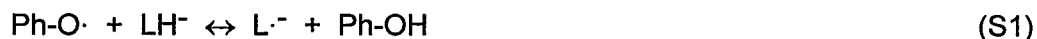

For coumaric acid (4-hydroxycinnamic acid) the rate constants for forward and reverse reaction are  $4.8 \times 10^7 \text{ M}^{-1} \text{ s}^{-1}$  and  $3.4 \times 10^6 \text{ M}^{-1} \text{ s}^{-1}$ , respectively<sup>10</sup>. Therefore, when the concentration of this phenol is too high it can act as a luminol radical scavenger.

In our system, p-iodophenol, coumaric acid and p-cresol quenched luminol-specific ELL as is shown in Fig. S2. The quenching effect of nitrite is reproduced in Fig. S2 to provide easier comparison with the effects of inorganic sulfate radical scavengers. The redox potentials for phenoxyl radicals are: 0.87 V and 0.77 V for p-iodophenol and p-cresol, respectively<sup>S1</sup>. The phenoxide ions ( $\text{Ph-O}^-$ ) in our system can react with sulfate and hydroxyl radicals yielding phenoxyl radicals:

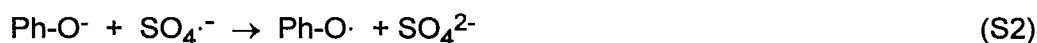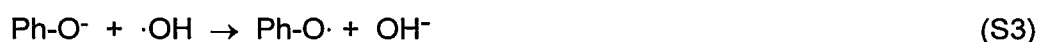

The rate constant  $k_{34}$  for coumaric acid and sulfate radicals is  $1.6 \times 10^9 \text{ M}^{-1} \text{ s}^{-1}$ , a decarboxylation also taking place in this case<sup>8</sup>. Reaction (S3) is characterized by the following rate constants<sup>12</sup>:  $k(\text{p-cresol} + \cdot\text{OH}) = 1.2 \times 10^{10} \text{ M}^{-1} \text{ s}^{-1}$ ,  $k(\text{p-coumaric acid} + \cdot\text{OH}) = 8.1 \times 10^9 \text{ M}^{-1} \text{ s}^{-1}$  and around  $10^9 \text{ M}^{-1} \text{ s}^{-1}$  for p-iodophenol. However, the p-iodophenol solution was prepared in DMSO, known as hydroxyl radical scavenger [ $k(\text{DMSO} + \cdot\text{OH}) = 7 \times 10^9 \text{ M}^{-1} \text{ s}^{-1}$ ]<sup>12</sup>. An ELL enhancing effect due to the added phenoxides could only be expected, if the oxidation step of  $\text{LH}^-$  is fast enough. The longer lifetime of phenoxide radicals in comparison to sulfate and hydroxyl radicals allows phenoxides to mediate oxidation of  $\text{LH}^-$ . However, it seems not possible to make luminol detection by the present ELL method more sensitive with simple phenoxide additives.

The anions of caffeic (3,4-dihydroxycinnamic acid) and protocatehuic (3,4-dihydroxybenzoic acid) acids denoted as  $\text{QH}_2$  (the charge of carboxyl group omitted for clarity) are known to enhance luminol- $\text{O}_2$ -hexacyanoferrate chemiluminescence in strongly alkaline conditions and quench the luminol- $\text{H}_2\text{O}_2$ -horseradish peroxidase

chemiluminescence<sup>S2</sup>. Dias et al. have proposed that the most strongly reducing anions of phenolic acids increases the conversion of luminol into endoperoxide ( $\text{LO}_2^{2-}$ ) via the following reactions:<sup>S2</sup>

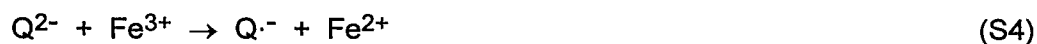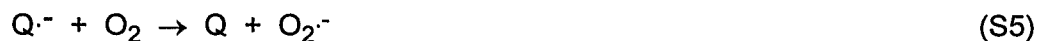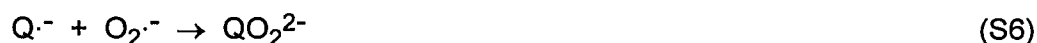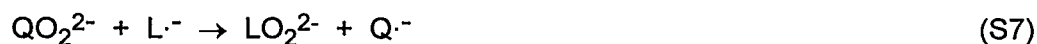

where  $\text{Q}^{2-}$  is the corresponding phenoxide ion of deprotonated phenolic acid,  $\text{Q}\cdot^-$  the enhancing species (phenoxyl radical), Q benzoquinone form and  $\text{QO}_2^{2-}$  the phenol endoperoxide. From the quenching effect of these phenolic acids on the luminol- $\text{H}_2\text{O}_2$ -horseradish peroxidase chemiluminescence, Dias et al. concluded these compounds to be too weak oxidants to oxidize luminol to luminol radical.

In our system with a fixed concentration  $1 \times 10^{-7}$  M of luminol, both phenolic acids ( $\text{QH}_2$ ) behave as enhancers at low concentrations (Fig. S2). For caffeic acid the enhancing effect is observable even at  $10^{-6}$  M and  $10^{-5}$  M concentrations, but at higher concentrations it quenches the present ELL. As with the previous phenols, these compounds can also scavenge the sulfate and hydroxyl radicals. The oxidation potentials for protocatehuic acid and caffeic acid are:  $E^0 = 0.084$  V and  $E^0 = 0.119$  V, respectively<sup>S1</sup>, hence, it is clear that these phenoxide radicals cannot oxidize  $\text{LH}\cdot^-$ . So, if luminol chemiluminescence is observed, the initial key step, one-electron oxidation of luminol monoanions, must be provided by other oxidizing agents, and when the sulfate and hydroxyl radicals are too efficiently scavenged by phenolic carboxylates the quenching effect is indeed observed (Fig. S2). For both caffeic and protocatehuic acids the phenoxyl radicals are semiquinone radicals (denoted as  $\text{QH}\cdot^-$ ) which are rapidly deprotonated to anion radical form ( $\text{Q}\cdot^-$ ) at  $\text{pH} = 12$  <sup>S3,S4</sup>. The first reactions which occur in the presence of the phenoxides of these phenolic acids are:

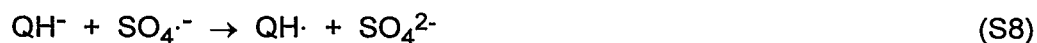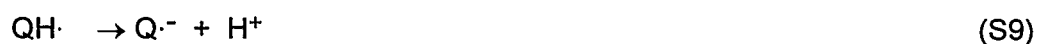

The resulting semiquinone radicals react fast with the dissolved molecular oxygen ( $\text{O}_2$  concentration ca.  $2 \times 10^{-4} \text{ M}$ )<sup>S4</sup>

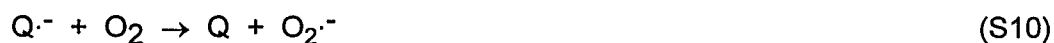

where Q, is the benzoquinone form of the initial compound. The rate constant for reaction of luminol radical  $\text{L}^\cdot$  with oxygen<sup>18,S6</sup> is  $550 \text{ M}^{-1} \text{ s}^{-1}$ , that is several orders of magnitude smaller than the rate constant for reaction (S10), which has been reported<sup>S7-S9</sup> for a series of quinones and hydroquinones to be around  $10^8 \text{ M}^{-1} \text{ s}^{-1}$ . The phenoxyl radical ( $\text{Q}^\cdot$ ) reacts further with superoxide radical yielding phenol endoperoxide ( $\text{QO}_2^-$ ), which reacts with luminol radical generating endoperoxide of luminol, as follows:

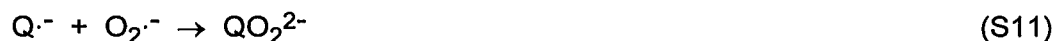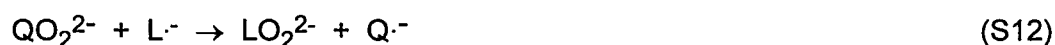

In conclusion, the enhancing effect of these phenolic acids is explained by the ability of their phenoxyl radicals ( $\text{Q}^\cdot$ ) to rapidly react with the dissolved  $\text{O}_2$  present in the solution through the reaction (S10), in this way accelerating the conversion of luminol radical to luminol endoperoxide, (S11-S12) the key intermediate in the light emission pathway in these conditions.

### Supporting Information References

S1 Wardman, P., *J. Phys. Chem. Ref. Data* **1989**, *18*, 1696-1755.

S2 Navas Dias, A.; Garcia Sanchez, F.; Gonzalez Garcia, J.A., *J. Biolumin. Chemilumin.* **1995**, *10*, 175-184.

- S3 Kortum, G.; Vogel, W.; Andrussow, K., *Dissociation Constants of Organic Acids in Aqueous Solution*, Butterworths, London 1961.
- S4 Neta, P., *Adv. Phys. Org. Chem.* **1976**, 12, 223-297.
- S5 Koppenol, W.; Butler, J., *Adv. Free Rad. Biol. Med.* **1985**, 1, 91-95.
- S6 Merenyi, G.; Lind, J.; Eriksen, T.E., *J. Phys. Chem.* **1984**, 88, 2320-2323.
- S7 Meisel, D., *Chem. Phys. Lett.* **1975**, 34, 263-267.
- S8 Meisel, D.; Fessenden, R., *J. Am. Chem. Soc.* **1976**, 98, 7505-510
- S9 Ebersson, L., *Electron Transfer reactions in Organic Chemistry*, Springer-Verlag, New York 1987.
